# Supplementary material
Source: PubMed Central journal article supplement (PMC3759265)
Supplement: NIHMS504708-supplement-1_si_001.pdf [file NIHMS504708-supplement-1_si_001.pdf]

## Supporting Information

### Endosomolytic reducible polymeric electrolytes for cytosolic protein delivery

Li Tian<sup>a,#</sup>, Han Chang Kang<sup>b,#</sup>, You Han Bae<sup>a, c,\*</sup>

<sup>a</sup> Department of Pharmaceutics and Pharmaceutical Chemistry, The University of Utah, 30 S 2000 E, Rm 2972, Salt Lake City, Utah 84112, USA

<sup>b</sup> Department of Pharmacy and Integrated Research Institute of Pharmaceutical Sciences, College of Pharmacy, The Catholic University of Korea, 43 Jibong-ro, Wonmi-gu, Bucheon-si, Gyeonggi-do 420-743, Republic of Korea

<sup>c</sup> Utah-Inha Drug Delivery Systems (DDS) and Advanced Therapeutics Research Center, 7-50 Songdo-dong, Yeonsu-gu, Incheon, 406-840, Republic of Korea

<sup>#</sup>LT and HCK contributed equally to this work.

\* Correspondence to:

Professor You Han Bae, Department of Pharmaceutics and Pharmaceutical Chemistry, The University of Utah, 30 S 2000 E, Rm 2972, Salt Lake City, Utah 84112, USA

Tel: +1-801-585-1518

Fax: +1-801-585-3614.

E-mail address: you.bae@utah.edu

Table S1. Consumed volume of 0.1 N HCl in protein solutions, polyelectrolyte solutions, and polyelectrolyte/protein complex solutions.

|                                         | $\Delta V_{\text{HCl}}$<br>(pH 7.4 – 7.0) | $\Delta V_{\text{HCl}}$<br>(pH 7.0 – 6.0) | $\Delta V_{\text{HCl}}$<br>(pH 6.0 – 5.1) | $\Delta V_{\text{HCl}}$<br>(pH 7.4 – 5.1) |
|-----------------------------------------|-------------------------------------------|-------------------------------------------|-------------------------------------------|-------------------------------------------|
| bPEI <sub>25kDa</sub>                   | 10.1                                      | 21.1                                      | 18.9                                      | 50.1                                      |
| bPEI <sub>25kDa</sub> /BSA (WR 1)       | 8.7                                       | 24.2                                      | 17.9                                      | 50.8                                      |
| RPC-bPEI <sub>0.8kDa</sub> 2            | 5.7                                       | 11.1                                      | 8.6                                       | 25.4                                      |
| RPC-bPEI <sub>0.8kDa</sub> 2/BSA (WR 1) | 4.7                                       | 11.3                                      | 9.8                                       | 25.8                                      |
| BSA                                     | 0.2                                       | 2.5                                       | 1.6                                       | 4.3                                       |

  

|                                         | $\Delta V_{\text{HCl}}$<br>(pH 7.4 – 7.0) | $\Delta V_{\text{HCl}}$<br>(pH 7.0 – 6.0) | $\Delta V_{\text{HCl}}$<br>(pH 6.0 – 5.1) | $\Delta V_{\text{HCl}}$<br>(pH 7.4 – 5.1) |
|-----------------------------------------|-------------------------------------------|-------------------------------------------|-------------------------------------------|-------------------------------------------|
| bPEI <sub>25kDa</sub> COOH              | 2.6                                       | 9.3                                       | 8.0                                       | 19.8                                      |
| bPEI <sub>25kDa</sub> COOH/LYZ (WR 1)   | 3.5                                       | 8.1                                       | 8.6                                       | 19.9                                      |
| RPA-bPEI <sub>0.8kDa</sub> 2            | 2.5                                       | 8.0                                       | 7.5                                       | 18.0                                      |
| RPA-bPEI <sub>0.8kDa</sub> 2/LYZ (WR 1) | 2.9                                       | 9.5                                       | 13.0                                      | 25.4                                      |
| LYZ                                     | 1.6                                       | 2.8                                       | 3.5                                       | 7.9                                       |

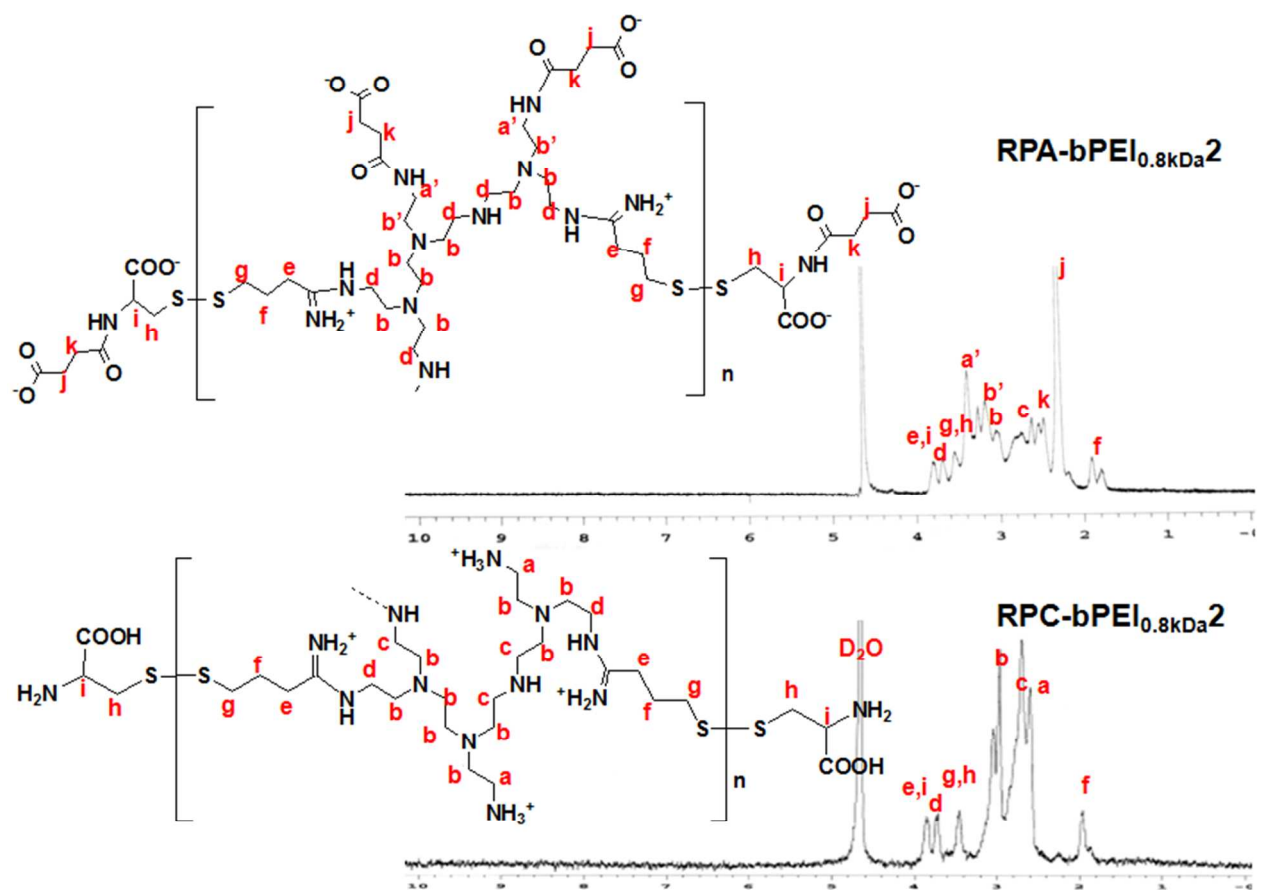

Figure S1. <sup>1</sup>H-NMR spectra of RPC-bPEI<sub>0.8kDa2</sub> and RPA-bPEI<sub>0.8kDa2</sub>

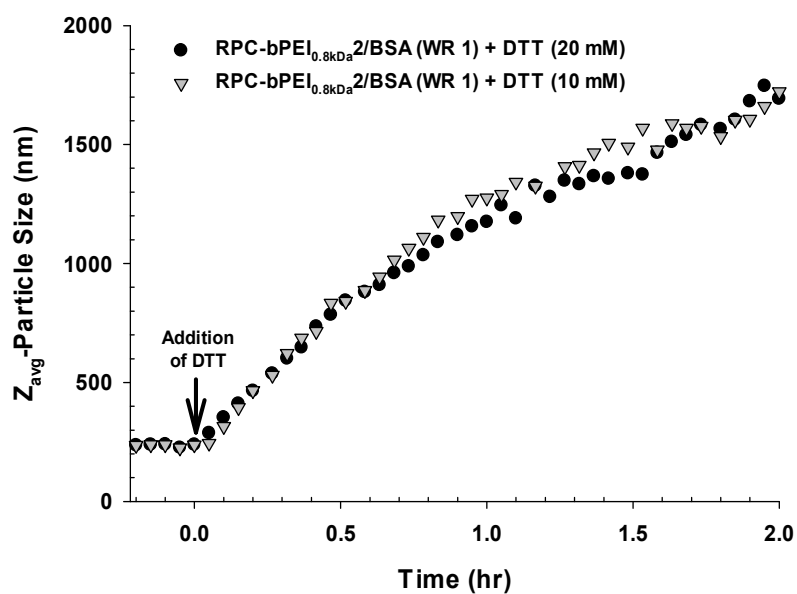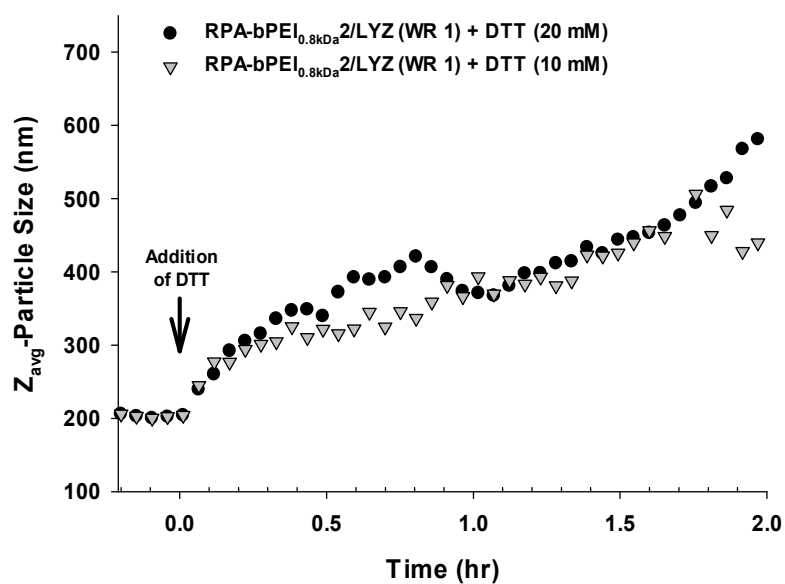

Figure S2. Time-dependent DTT-induced size change of polymer/protein complexes (WR 1) at RT in the presence of DTT (10 mM or 20 mM)

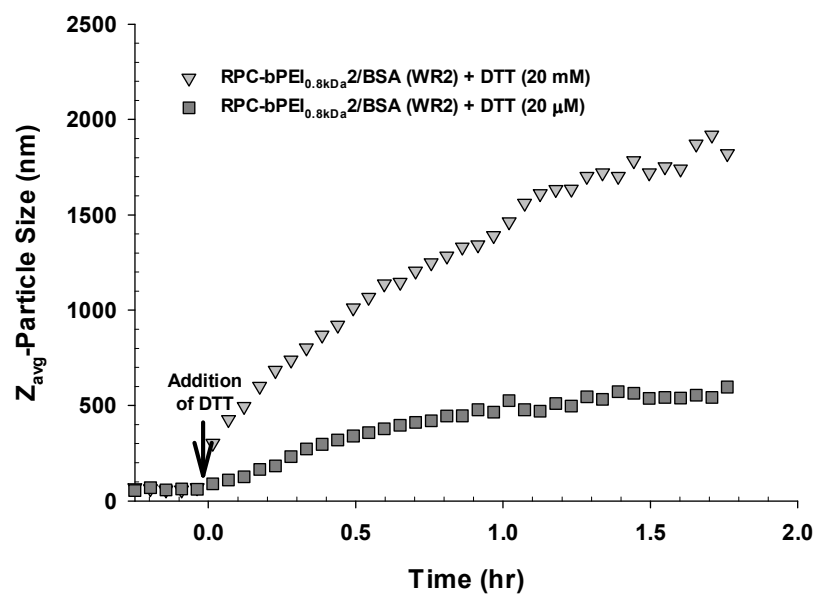

Figure S3. Time-dependent DTT-induced size change of RPC-bPEI<sub>0.8kDa</sub><sup>2</sup>/BSA complexes (WR2) at RT in the presence or absence of DTT (20 μM or 20 mM)
